# Supplementary material
Source: PubMed Central journal article supplement (PMC7168798)

**Supplementary Figure 1: Comparison of  $V_T$  Estimates by 1T, 2T, and MA1 Models**

(A) shows estimates of  $V_T$  made by 1T and 2T models, which were highly correlated ( $R^2=0.984$ ).

(B) shows that 1T estimates of  $V_T$  were 8.6% lower than 2T estimates on average. (C) shows

estimates of  $V_T$  made by 2T and MA1 ( $t^*=30$ ) models, which were highly correlated ( $R^2=0.990$ ).

(D) shows that MA1 estimates of  $V_T$  were 0.5% lower than 2T estimates on average. Unstable fits for 2T and corresponding fits for 1T and MA1 were excluded.

**A) Correlation of  $V_T$  estimates**

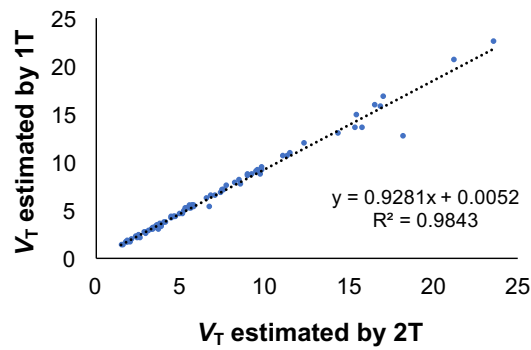

**B) Bland-Altman Plot of  $V_T$  estimates**

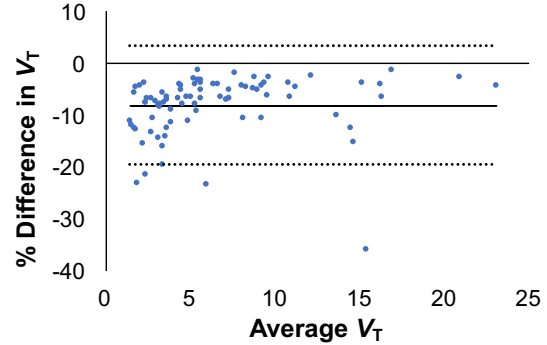

**C) Correlation of  $V_T$  estimates**

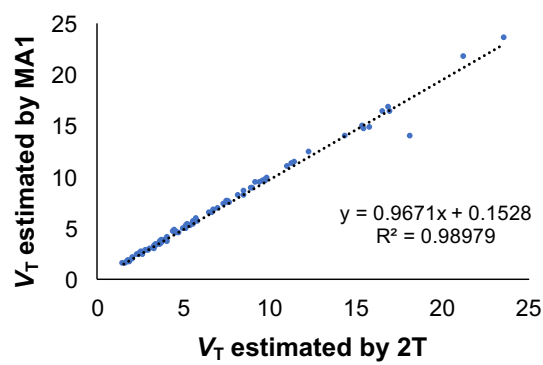

**D) Bland-Altman Plot of  $V_T$  estimates**

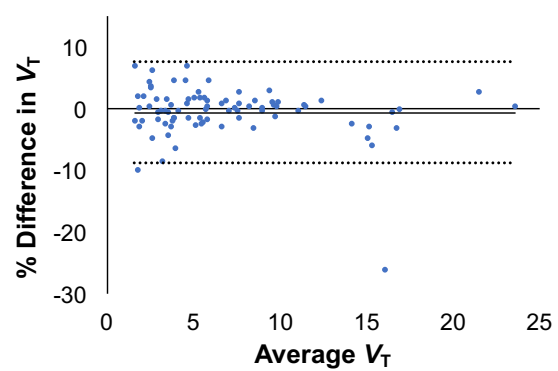

## Supplementary Figure 2: Correlation of $V_T$ to $SUV$ across scans

$V_T$  values estimated by MA1 with 180 min of imaging data were highly linearly correlated with average  $SUV$  for 60-90 min in **(A)** ( $n=12$ ,  $R^2=0.803$ ), 90-120 min in **(B)** ( $n=12$ ,  $R^2=0.814$ ), 120-150 min in **(C)** ( $n=12$ ,  $R^2=0.836$ ), 150-180 min in **(D)** ( $n=12$ ,  $R^2=0.851$ ), 180-210 min in **(E)** ( $n=8$ ,  $R^2=0.902$ ), and for 210-240 min in **(F)** ( $n=8$ ,  $R^2=0.913$ ).

**(A)  $SUV$  (60-90 min) vs.  $V_T$  (180 min)**

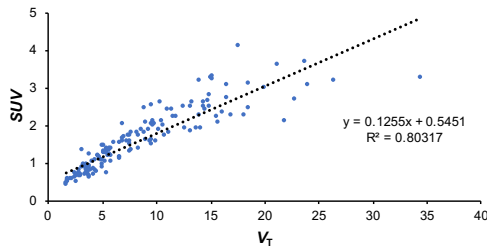

**(B)  $SUV$  (90-120 min) vs.  $V_T$  (180 min)**

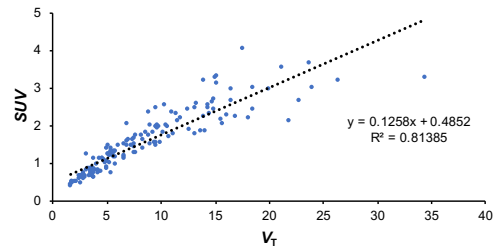

**(C)  $SUV$  (120-150 min) vs.  $V_T$  (180 min)**

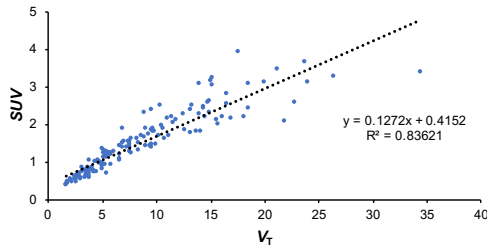

**(D)  $SUV$  (150-180 min) vs.  $V_T$  (180 min)**

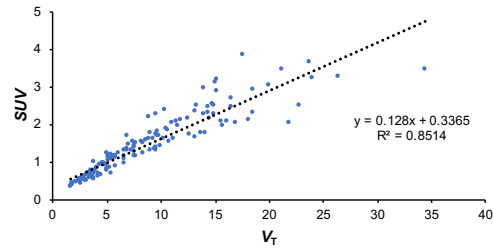

**(E)  $SUV$  (180-210 min) vs.  $V_T$  (180 min)**

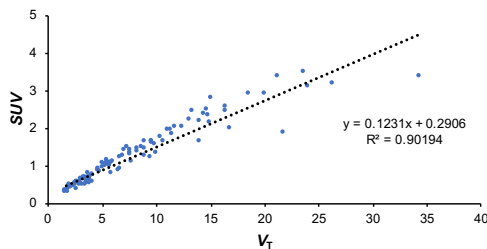

**(F)  $SUV$  (210-240 min) vs.  $V_T$  (180 min)**

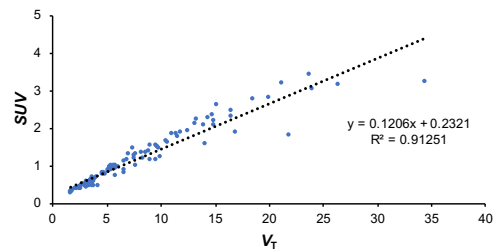

**Supplementary Figure 3: Relationship of Peripheral Cortisol to [<sup>18</sup>F]AS2471907 Availability**

Correlation of [<sup>18</sup>F]AS2471907 whole brain  $V_T$  to area under the curve (AUC) of cortisol concentration in **(A)** and to slope of decline in plasma cortisol concentration in **(B)**. Measures were calculated from plasma cortisol sampled at 0, 30, 60, and 90 min post-injection. Exploratory post-hoc analyses of  $V_T$  with peripheral cortisol across all ROIs did not reveal any significant correlations with any region.

**(A) [<sup>18</sup>F]AS2471907  $V_T$  vs. AUC CORT**

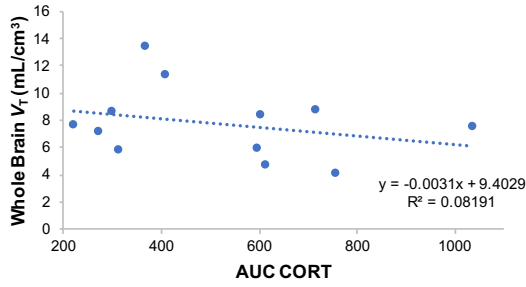

**(B) [<sup>18</sup>F]AS2471907  $V_T$  vs. CORT slope**

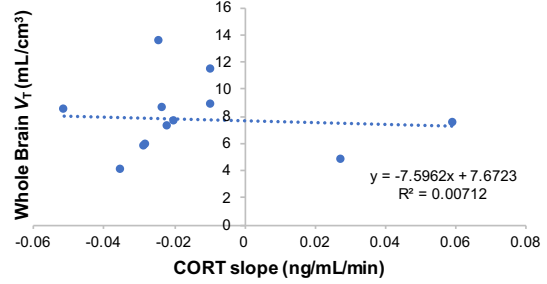

Supplement: SupplementalMaterial.pdf [file SupplementalMaterial.pdf]
